# Supplementary material
Source: publisher figshare collection journal article supplement (https://karger.figshare.com/ndownloader/files/23898932)
Supplement: Supplementary file 1 [file 23898932]

**Table S1.** Chemotherapeutic regimens administered before weekly nab-PTX

| **Chemotherapeutic regimens** | **First line** | **Second line** | **Third line** | **Fourth line** | **Fifth line** |
| --- | --- | --- | --- | --- | --- |
| Gefitinib | 10 | 2 |  |  |  |
| Carboplatin + Pemetrexed + Bevacizumab | 8 | 4 |  |  |  |
| Carboplatin + Pemetrexed | 4 | 6 | 1 |  |  |
| Cisplatin + S-1 + radiotherapy | 2 |  |  |  |  |
| Cisplatin+S-1++Bevacizumab | 2 |  |  |  |  |
| Carboplatin + S-1 | 2 |  |  |  |  |
| Cisplatin + Pemetrexed | 1 | 1 |  |  |  |
| Cisplatin + Pemetrexed + Bevacizumab | 1 |  |  |  |  |
| Cisplatin + Gemcitabine | 1 |  |  |  |  |
| Carboplatin + Docetaxel + radiotherapy | 1 |  |  |  |  |
| Carboplatin + Gemcitabine | 1 |  |  |  |  |
| Carboplatin + Etoposide | 1 |  |  |  |  |
| Erlotinib | 1 | 1 | 1 |  |  |
| Afatinib |  |  |  |  | 1 |
| Docetaxel |  | 2 | 2 | 1 |  |
| Pemetrexed |  | 1 |  |  |  |
